# Supplementary material for: Level of theory study of magnetic resonance parameters of chalcogen XY−(X, Y = O, S and Se) defects in alkali halides
Source: Royal Society of Chemistry journal article supplement (doi:10.1039/b412408a), 2004-12-09
Supplement: b412408a-esi.pdf [file b412408a-esi.pdf]

Level of theory study of magnetic resonance parameters of  
chalcogen  $XY^-$  (X, Y = O, S and Se) defects in alkali  
halides

F. Stevens<sup>[a,b]</sup>, V. Van Speybroeck<sup>[a]</sup>, E. Pauwels<sup>[a]</sup>,  
H. Vrielinck<sup>[b]</sup>, F. Callens<sup>[b]</sup> and M.Waroquier<sup>[a]\*</sup>

November 16, 2004

---

\*To whom all correspondence should be addressed

[a] Laboratory of Theoretical Physics, Ghent University, Proeftuinstraat 86, B-9000 Ghent, Belgium, Fax :  
+32-9-264.65.60, E-mail : michel.waroquier@UGent.be

[b] Department of Solid State Sciences, Ghent University, Krijgslaan 281-S1, B-9000 Ghent, Belgium

## CAPTIONS OF THE SUPPORTING FIGURES

S.Fig. 1: Calculated g values for  $\text{NaCl}:\text{O}_2^-$  using the VWN/IV//VWN/IV/IV (ADF), VWN/IV//Bp86/IV/IV/ (ADF) and VWN/IV//B3LYP/6-311G\*\*/6-31G\*\* (G03) functional form as a function of the number of neighboring lattice shells that are allowed to relax.

S.Fig. 2: Relaxations of the first two lattice shells for the  $\text{NaCl}:\text{O}_2^-$  defect structure as a function of increasing basis set. The same convention as described in the caption of Fig. 4 is used.

S.Fig. 3: Relaxations of the first two lattice shells for the  $\text{NaCl}:\text{Se}_2^-$  defect structure as a function of increasing basis set. The same convention as described in the caption of Fig. 4 is used.

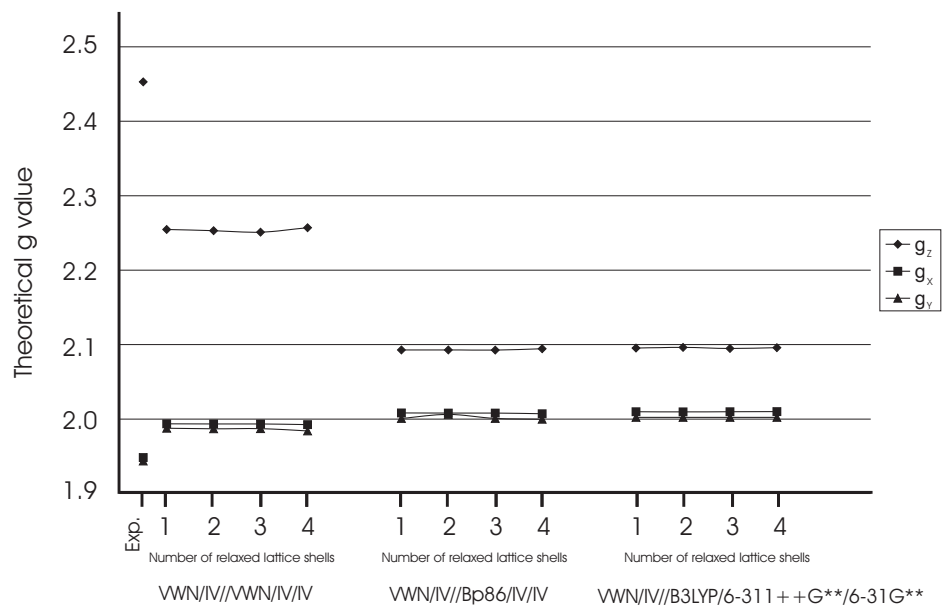

S. Figure 1  
F. Stevens

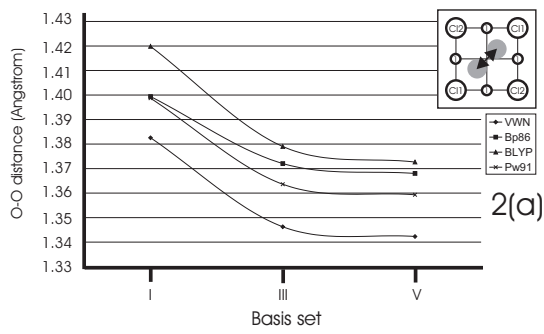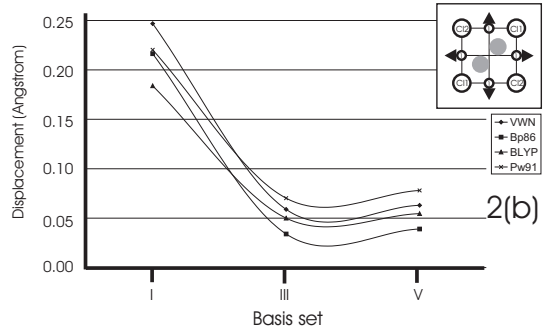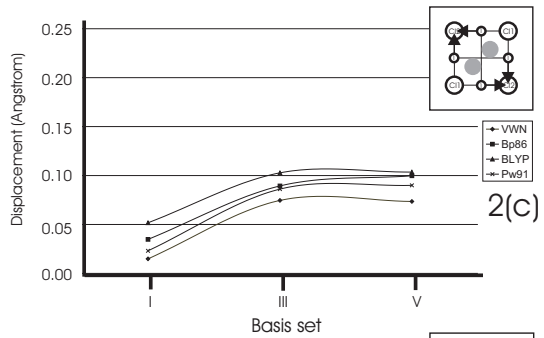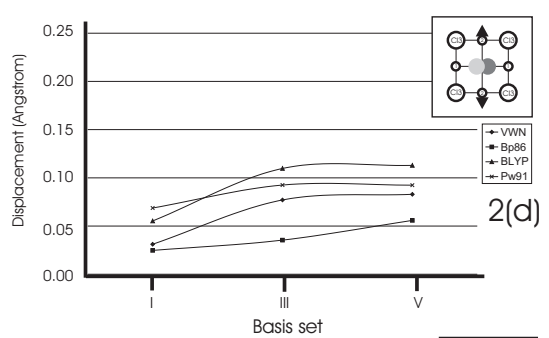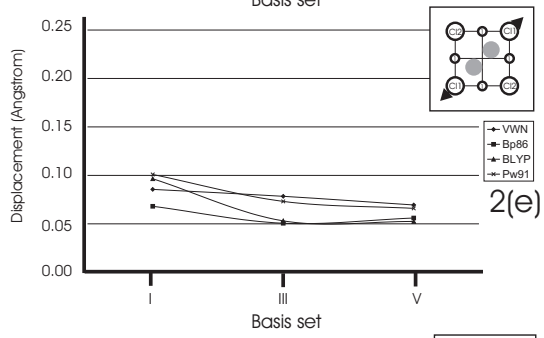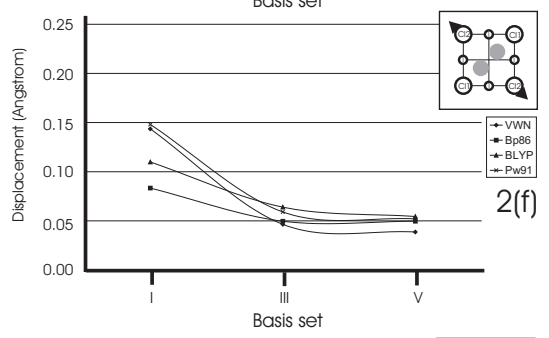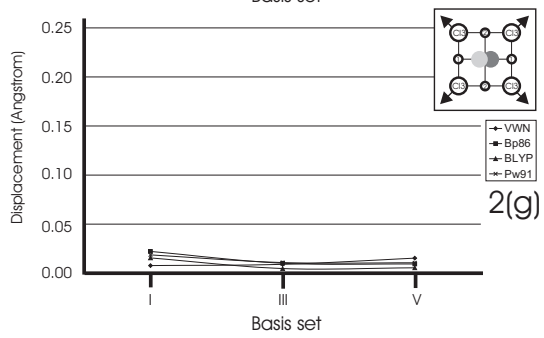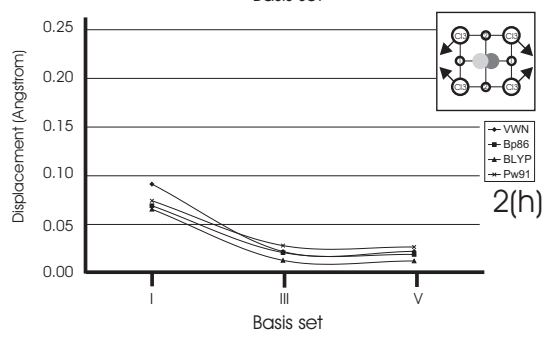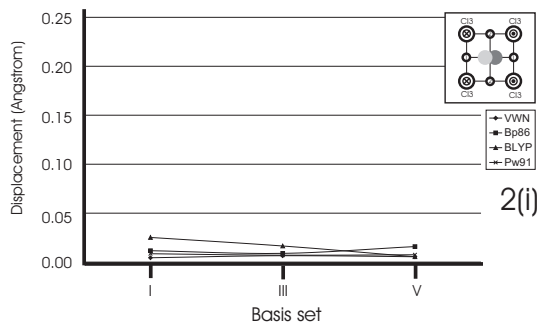

S. Figure 2  
F. Stevens

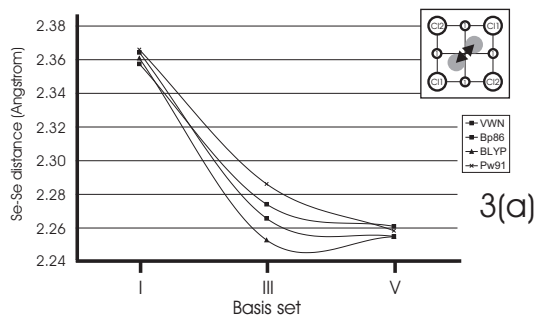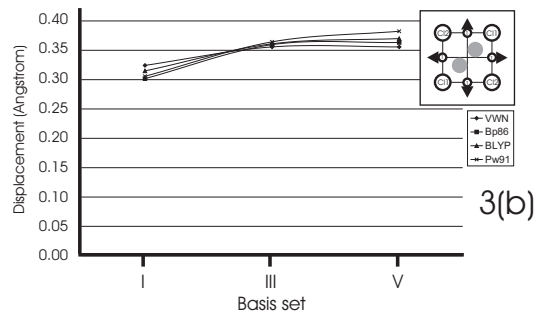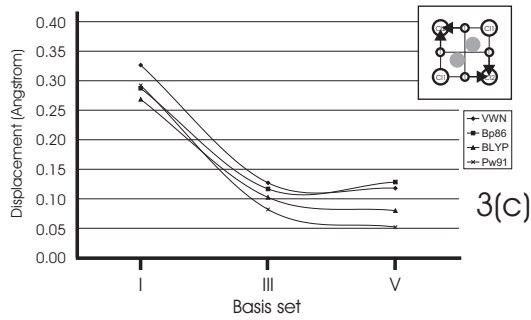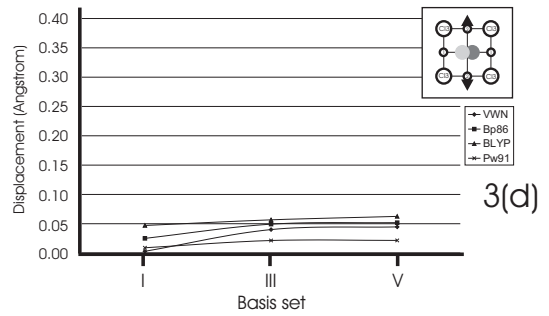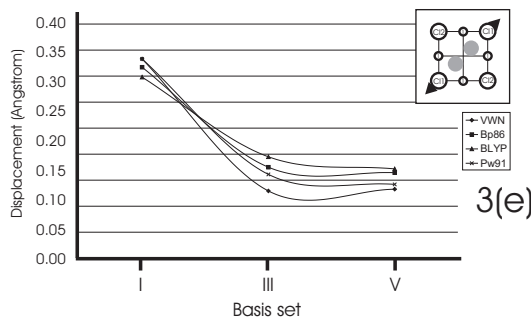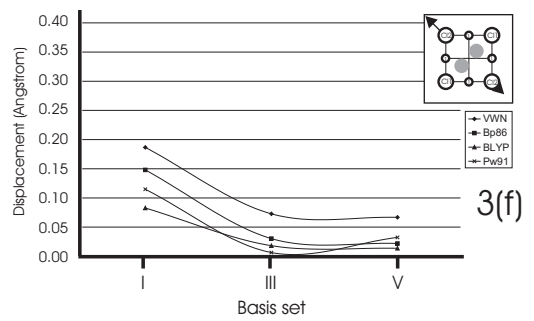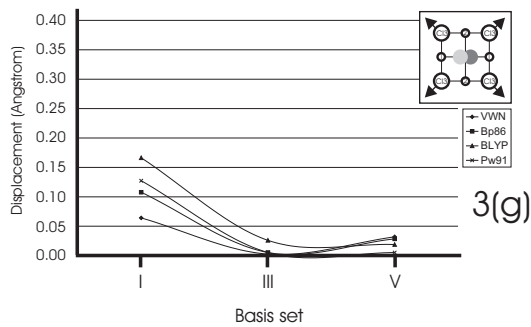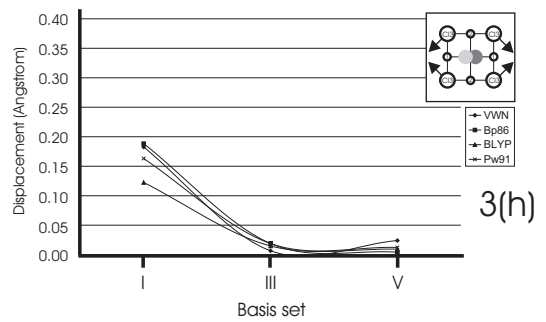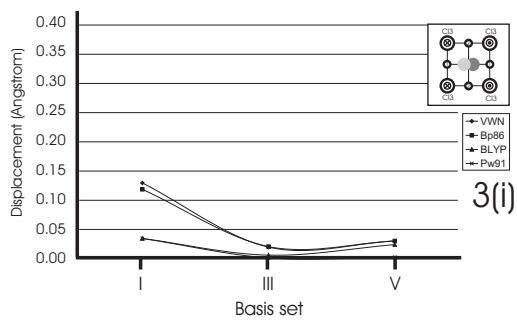

S. Figure 3  
F. Stevens

S. Table I. Comparison between experimental and computed g values using a cluster in vacuo model and an embedded cluster approach. All calculations are performed with the ADF program package and basis set IV.

| lattice | defect                                    |                | exp    | vacuo  |        | embedded |        |
|---------|-------------------------------------------|----------------|--------|--------|--------|----------|--------|
|         |                                           |                |        | VWN    | Bp86   | VWN      | Bp86   |
| NaCl    | O <sub>2</sub> <sup>-</sup> <sup>a</sup>  | g <sub>x</sub> | 1,9438 | 1,9935 | 2,0080 | 1,9862   | 2,0096 |
|         |                                           | g <sub>y</sub> | 1,9436 | 1,9869 | 2,0063 | 1,9797   | 2,0023 |
|         |                                           | g <sub>z</sub> | 2,4529 | 2,2531 | 2,0928 | 2,2796   | 2,1047 |
| NaCl    | Se <sub>2</sub> <sup>-</sup> <sup>b</sup> | g <sub>x</sub> | 1,8862 | 1,9141 | 1,9899 | 1,8999   | 1,9426 |
|         |                                           | g <sub>y</sub> | 1,7923 | 1,8226 | 1,8844 | 1,7844   | 1,8456 |
|         |                                           | g <sub>z</sub> | 2,8356 | 2,7256 | 2,6352 | 2,7413   | 2,6389 |
| KCl     | O <sub>2</sub> <sup>-</sup> <sup>a</sup>  | g <sub>x</sub> | 1,9512 | 1,8674 | 1,9968 | 0,6022   | 1,9966 |
|         |                                           | g <sub>y</sub> | 1,9551 | 1,8799 | 2,0036 | 0,6029   | 2,0023 |
|         |                                           | g <sub>z</sub> | 2,4360 | 2,6715 | 2,1413 | 3,8352   | 2,1441 |
| KI      | O <sub>2</sub> <sup>-</sup> <sup>a</sup>  | g <sub>x</sub> | 1,9370 | 1,7997 | 1,9988 | 1,7456   | 2,0017 |
|         |                                           | g <sub>y</sub> | 1,9420 | 1,8057 | 2,0079 | 1,7509   | 2,0114 |
|         |                                           | g <sub>z</sub> | 2,4859 | 2,8292 | 2,1179 | 3,2581   | 2,1494 |
| RbBr    | S <sub>2</sub> <sup>-</sup> <sup>c</sup>  | g <sub>x</sub> | 1,7448 | 0,3491 | 0,6418 | 0,3287   | 0,5290 |
|         |                                           | g <sub>y</sub> | 1,7571 | 0,3516 | 0,6465 | 0,3328   | 0,5468 |
|         |                                           | g <sub>z</sub> | 2,8936 | 3,7924 | 3,6644 | 3,7677   | 3,5835 |

<sup>a</sup>Reference[8]

<sup>b</sup>Reference[17]

<sup>c</sup>Reference[12]

S.Table II. Comparison between experimental and calculated g values for the MZ:XY defect structures using various level of theory. Also, the relative error (R.E.) and the deviation from the free electron value for  $g_z$  are listed. For the Rb atoms, the Huzinaga (HP,ref.[55]) and Glendening polarization (GP,ref.[56]) are used.

| opt.                                   | level of theory: EPR calculation |              |               |         |               | theoretical   |               |               | R.E.          | $\Delta g_z$  |
|----------------------------------------|----------------------------------|--------------|---------------|---------|---------------|---------------|---------------|---------------|---------------|---------------|
|                                        | XC                               | basis defect | basis lattice |         | $g_x$         | $g_y$         | $g_z$         |               |               |               |
|                                        |                                  |              | alkali        | halide  |               |               |               |               |               |               |
| <b>NaCl:O<sub>2</sub><sup>-a</sup></b> |                                  |              |               |         |               | <b>1,9483</b> | <b>1,9436</b> | <b>2,4529</b> |               | <b>0,4506</b> |
| VWN/IV                                 | VWN                              | III          | III           | III     | 1,9919        | 1,9851        | 2,2605        | 7,84          | 0,2582        |               |
| VWN/IV                                 | VWN                              | IV           | IV            | IV      | 1,9935        | 1,9869        | 2,2531        | 8,15          | 0,2508        |               |
| VWN/IV                                 | VWN                              | V            | V             | V       | 1,9958        | 1,9895        | 2,2363        | 8,83          | 0,2340        |               |
| VWN/IV                                 | BP86                             | III          | III           | III     | 2,0063        | 2,0085        | 2,1055        | 14,16         | 0,1032        |               |
| VWN/IV                                 | BP86                             | IV           | IV            | IV      | 2,0080        | 2,0063        | 2,0928        | 14,68         | 0,0905        |               |
| VWN/IV                                 | BP86                             | V            | V             | V       | 2,0082        | 2,0008        | 2,0858        | 14,97         | 0,0835        |               |
| VWN/IV                                 | VWN                              | EPR-II       | 6-31g**       | 6-31g** | 1,9648        | 1,9646        | 2,2145        | 9,72          | 0,2122        |               |
| VWN/IV                                 | VWN                              | 6-311g**     | 6-31g**       | 6-31g** | 1,9637        | 1,9463        | 2,2248        | 9,30          | 0,2225        |               |
| VWN/IV                                 | VWN                              | Sadlej       | 6-31g**       | 6-31g** | 1,9548        | 1,9346        | 2,1946        | 10,53         | 0,1923        |               |
| VWN/IV                                 | VWN                              | augg-cc-pV6Z | 6-31g**       | 6-31g** | 1,9878        | 1,9601        | 2,1999        | 10,31         | 0,1976        |               |
| VWN/IV                                 | B3LYP                            | EPR-II       | 6-31g**       | 6-31g** | 2,0096        | 2,0022        | 2,0947        | 14,60         | 0,0924        |               |
| VWN/IV                                 | B3LYP                            | 6-311g**     | 6-31g**       | 6-31g** | 2,0097        | 2,0022        | 2,0963        | 14,54         | 0,0940        |               |
| VWN/IV                                 | B3LYP                            | Sadlej       | 6-31g**       | 6-31g** | 2,0095        | 2,0022        | 2,0907        | 14,77         | 0,0884        |               |
| VWN/IV                                 | B3LYP                            | augg-cc-pV6Z | 6-31g**       | 6-31g** | 2,0099        | 2,0022        | 2,0887        | 14,85         | 0,0864        |               |
| VWN/IV                                 | VWN                              | 6-311g**     | 6-311g**      | 6-31g** | 1,9635        | 1,9467        | 2,2289        | 9,13          | 0,2266        |               |
| VWN/IV                                 | VWN                              | 6-311g**     | Sadlej        | 6-31g** | 1,9685        | 1,9468        | 2,2301        | 9,08          | 0,2278        |               |
| VWN/IV                                 | B3LYP                            | 6-311g**     | 6-311g**      | 6-31g** | 2,0097        | 2,0022        | 2,0970        | 14,51         | 0,0947        |               |
| VWN/IV                                 | B3LYP                            | 6-311g**     | Sadlej        | 6-31g** | 2,0098        | 2,0022        | 2,0980        | 14,47         | 0,0957        |               |
| VWN/IV                                 | B3PW91                           | 6-311g**     | 6-31g**       | 6-31g** | 2,0095        | 2,0022        | 2,0965        | 14,53         | 0,0942        |               |
| VWN/IV                                 | B3P86                            | 6-311g**     | 6-31g**       | 6-31g** | 2,0095        | 2,0022        | 2,0987        | 14,44         | 0,0964        |               |
| VWN/IV                                 | PBE1PBE                          | 6-311g**     | 6-31g**       | 6-31g** | 2,0096        | 2,0021        | 2,0983        | 14,46         | 0,0960        |               |
| VWN/IV                                 | BHandHLyp                        | 6-311g**     | 6-31g**       | 6-31g** | 2,0112        | 2,0021        | 2,1059        | 14,15         | 0,1036        |               |
| <b>NaCl:S<sub>2</sub><sup>-b</sup></b> |                                  |              |               |         | <b>2,0107</b> | <b>1,9860</b> | <b>2,2531</b> |               | <b>0,2508</b> |               |
| VWN/IV                                 | VWN                              | III          | III           | III     | 2,0060        | 1,9817        | 2,2737        | -0,91         | 0,2714        |               |
| VWN/IV                                 | VWN                              | IV           | IV            | IV      | 2,0094        | 1,9865        | 2,2642        | -0,49         | 0,2619        |               |
| VWN/IV                                 | VWN                              | V            | V             | V       | 2,0146        | 1,9902        | 2,2213        | 1,41          | 0,2190        |               |
| VWN/IV                                 | BP86                             | III          | III           | III     | 2,0285        | 1,9903        | 2,2005        | 2,33          | 0,1982        |               |
| VWN/IV                                 | BP86                             | IV           | IV            | IV      | 2,0191        | 1,9946        | 2,1895        | 2,82          | 0,1872        |               |
| VWN/IV                                 | BP86                             | V            | V             | V       | 2,0217        | 1,9959        | 2,1791        | 3,28          | 0,1768        |               |
| VWN/IV                                 | VWN                              | 6-311g**     | 6-31g         | 6-31g** | 2,0069        | 1,9973        | 2,1985        | 2,42          | 0,1962        |               |
| VWN/IV                                 | VWN                              | 6-311g**     | 6-31g*        | 6-31g** | 2,0072        | 1,9986        | 2,2053        | 2,12          | 0,2030        |               |
| VWN/IV                                 | VWN                              | 6-311g**     | 6-31g**       | 6-31g** | 2,0078        | 1,9989        | 2,2364        | 0,74          | 0,2341        |               |
| VWN/IV                                 | VWN                              | EPR-II       | 6-31g**       | 6-31g** | 2,0061        | 1,9964        | 2,2365        | 0,74          | 0,2342        |               |
| VWN/IV                                 | VWN                              | Sadlej       | 6-31g**       | 6-31g** | 2,0063        | 1,9924        | 2,2296        | 1,04          | 0,2273        |               |
| VWN/IV                                 | VWN                              | augg-cc-pV6Z | 6-31g**       | 6-31g** | 2,0060        | 1,9942        | 2,2292        | 1,06          | 0,2269        |               |
| VWN/IV                                 | B3LYP                            | EPR-II       | 6-31g**       | 6-31g** | 2,0377        | 2,0036        | 2,2047        | 2,15          | 0,2024        |               |
| VWN/IV                                 | B3LYP                            | 6-311g**     | 6-31g**       | 6-31g** | 2,0362        | 2,0031        | 2,2068        | 2,05          | 0,2045        |               |
| VWN/IV                                 | B3LYP                            | Sadlej       | 6-31g**       | 6-31g** | 2,0345        | 2,0030        | 2,2058        | 2,10          | 0,2035        |               |
| VWN/IV                                 | B3LYP                            | augg-cc-pV6Z | 6-31g**       | 6-31g** | 2,0374        | 2,0031        | 2,2001        | 2,35          | 0,1978        |               |
| VWN/IV                                 | VWN                              | 6-311g**     | 6-311g**      | 6-31g** | 2,0068        | 1,9931        | 2,2436        | 0,42          | 0,2413        |               |
| VWN/IV                                 | VWN                              | 6-311g**     | Sadlej        | 6-31g** | 2,0096        | 1,9903        | 2,2503        | 0,12          | 0,2480        |               |
| VWN/IV                                 | B3LYP                            | 6-311g**     | 6-311g**      | 6-31g** | 2,0335        | 2,0030        | 2,2078        | 2,01          | 0,2055        |               |
| VWN/IV                                 | B3LYP                            | 6-311g**     | Sadlej        | 6-31g** | 2,0315        | 2,0024        | 2,2104        | 1,90          | 0,2081        |               |
| VWN/IV                                 | B3PW91                           | 6-311g**     | 6-31g**       | 6-31g** | 2,0332        | 2,0029        | 2,2077        | 2,02          | 0,2054        |               |
| VWN/IV                                 | B3P86                            | 6-311g**     | 6-31g**       | 6-31g** | 2,0333        | 2,0029        | 2,2091        | 1,95          | 0,2068        |               |
| VWN/IV                                 | PBE1PBE                          | 6-311g**     | 6-31g**       | 6-31g** | 2,0334        | 2,0028        | 2,1700        | 3,69          | 0,1677        |               |
| VWN/IV                                 | BHandHLyp                        | 6-311g**     | 6-31g**       | 6-31g** | 2,0361        | 2,0027        | 2,1927        | 2,68          | 0,1904        |               |

|                                         |           |          |         |         |  |               |               |               |       |               |
|-----------------------------------------|-----------|----------|---------|---------|--|---------------|---------------|---------------|-------|---------------|
| <b>NaCl:SSe<sup>-c</sup></b>            |           |          |         |         |  | <b>1,9421</b> | <b>1,8818</b> | <b>2,6393</b> |       | <b>0,6370</b> |
| VWN/IV                                  | VWN       | IV       | IV      | IV      |  | 1,8920        | 1,8419        | 2,6812        | -1,59 | 0,6789        |
| VWN/IV                                  | Bp86      | IV       | IV      | IV      |  | 1,9724        | 1,9095        | 2,5482        | 3,45  | 0,5459        |
| VWN/IV                                  | B3LYP     | 6-311g** | 6-31g** | 6-31g** |  | 2,0846        | 2,0031        | 2,4820        | 5,96  | 0,4797        |
| <b>NaCl:Se<sub>2</sub><sup>-c</sup></b> |           |          |         |         |  | <b>1,8862</b> | <b>1,7923</b> | <b>2,8356</b> |       | <b>0,8333</b> |
| VWN/IV                                  | VWN       | III      | III     | III     |  | 1,8981        | 1,7992        | 2,7932        | 1,50  | 0,7909        |
| VWN/IV                                  | VWN       | IV       | IV      | IV      |  | 1,9141        | 1,8226        | 2,7256        | 3,88  | 0,7233        |
| VWN/IV                                  | VWN       | V        | V       | V       |  | 1,9346        | 1,8654        | 2,6941        | 4,99  | 0,6918        |
| VWN/IV                                  | BP86      | III      | III     | III     |  | 1,9793        | 1,8774        | 2,6469        | 6,65  | 0,6446        |
| VWN/IV                                  | BP86      | IV       | IV      | IV      |  | 1,9899        | 1,8844        | 2,6352        | 7,07  | 0,6329        |
| VWN/IV                                  | BP86      | V        | V       | V       |  | 2,0016        | 1,9354        | 2,5352        | 10,59 | 0,5329        |
| VWN/IV                                  | VWN       | 6-311g** | 6-31g** | 6-31g** |  | 1,9637        | 1,9463        | 2,2248        | 21,54 | 0,2225        |
| VWN/IV                                  | BP86      | 6-311g** | 6-31g** | 6-31g** |  | 2,0011        | 2,0006        | 2,0924        | 26,21 | 0,0901        |
| VWN/IV                                  | B3LYP     | 6-311g** | 6-31g** | 6-31g** |  | 2,0097        | 2,0022        | 2,0963        | 26,07 | 0,0940        |
| VWN/IV                                  | B3PW91    | 6-311g** | 6-31g** | 6-31g** |  | 2,0095        | 2,0022        | 2,0965        | 26,07 | 0,0942        |
| VWN/IV                                  | B3P86     | 6-311g** | 6-31g** | 6-31g** |  | 2,0095        | 2,0022        | 2,0987        | 25,99 | 0,0964        |
| VWN/IV                                  | PBE1PBE   | 6-311g** | 6-31g** | 6-31g** |  | 2,0096        | 2,0021        | 2,0983        | 26,00 | 0,0960        |
| VWN/IV                                  | BHandHLYp | 6-311g** | 6-31g** | 6-31g** |  | 2,0112        | 2,0021        | 2,1059        | 25,73 | 0,1036        |
| <b>NaBr:O<sub>2</sub><sup>-a</sup></b>  |           |          |         |         |  | <b>1,9705</b> | <b>1,9663</b> | <b>2,3733</b> |       | <b>0,3710</b> |
| VWN/IV                                  | VWN       | IV       | IV      | IV      |  | 2,0001        | 1,9959        | 2,2739        | 4,19  | 0,2716        |
| VWN/IV                                  | Bp86      | IV       | IV      | IV      |  | 2,0115        | 2,0061        | 2,0993        | 11,55 | 0,0970        |
| <b>NaBr:S<sub>2</sub><sup>-d</sup></b>  |           |          |         |         |  | <b>2,0114</b> | <b>1,9876</b> | <b>2,2379</b> |       | <b>0,2356</b> |
| VWN/IV                                  | VWN       | IV       | IV      | IV      |  | 2,0187        | 1,9935        | 2,2586        | -0,92 | 0,2563        |
| VWN/IV                                  | Bp86      | IV       | IV      | IV      |  | 2,0537        | 1,9953        | 2,3528        | -5,13 | 0,3505        |
| <b>NaBr:SSe<sup>-e</sup></b>            |           |          |         |         |  | <b>1,9365</b> | <b>1,8916</b> | <b>2,6259</b> |       | <b>0,6236</b> |
| VWN/IV                                  | VWN       | IV       | IV      | IV      |  | 1,9359        | 1,8953        | 2,6229        | 0,11  | 0,6206        |
| VWN/IV                                  | Bp86      | IV       | IV      | IV      |  | 1,9887        | 1,9356        | 2,5221        | 3,95  | 0,5198        |
| <b>NaBr:Se<sub>2</sub><sup>-e</sup></b> |           |          |         |         |  | <b>1,9007</b> | <b>1,8079</b> | <b>2,8073</b> |       | <b>0,8050</b> |
| VWN/IV                                  | VWN       | IV       | IV      | IV      |  | 1,9196        | 1,8407        | 2,7344        | 2,60  | 0,7321        |
| VWN/IV                                  | Bp86      | IV       | IV      | IV      |  | 1,9785        | 1,8850        | 2,6609        | 5,21  | 0,6586        |
| <b>NaI:O<sub>2</sub><sup>-a</sup></b>   |           |          |         |         |  | <b>1,9996</b> | <b>2,0004</b> | <b>2,1859</b> |       | <b>0,1836</b> |
| VWN/IV                                  | VWN       | IV       | IV      | IV      |  | 1,9882        | 1,9943        | 2,2849        | -4,53 | 0,2826        |
| VWN/IV                                  | Bp86      | IV       | IV      | IV      |  | 2,0049        | 2,0116        | 2,1153        | 3,23  | 0,1130        |
| <b>NaI:S<sub>2</sub><sup>-f</sup></b>   |           |          |         |         |  | <b>2,0178</b> | <b>1,9942</b> | <b>2,2303</b> |       | <b>0,2280</b> |
| VWN/IV                                  | VWN       | IV       | IV      | IV      |  | 2,0189        | 2,0000        | 2,2471        | -0,75 | 0,2448        |
| VWN/IV                                  | Bp86      | IV       | IV      | IV      |  | 2,0259        | 2,0119        | 2,2026        | 1,24  | 0,2003        |
| <b>NaI:SSe<sup>-g</sup></b>             |           |          |         |         |  | <b>1,9675</b> | <b>1,9004</b> | <b>2,6064</b> |       | <b>0,6041</b> |
| VWN/IV                                  | VWN       | IV       | IV      | IV      |  | 1,9581        | 1,9238        | 2,5943        | 0,46  | 0,5920        |
| VWN/IV                                  | Bp86      | IV       | IV      | IV      |  | 2,0049        | 1,9571        | 2,4924        | 4,37  | 0,4901        |
| <b>NaI:Se<sub>2</sub><sup>-g</sup></b>  |           |          |         |         |  | <b>1,9042</b> | <b>1,8148</b> | <b>2,8015</b> |       | <b>0,7992</b> |
| VWN/IV                                  | VWN       | IV       | IV      | IV      |  | 1,8795        | 1,8211        | 2,8013        | 0,01  | 0,7990        |
| VWN/IV                                  | Bp86      | IV       | IV      | IV      |  | 1,9538        | 1,8776        | 2,7072        | 3,37  | 0,7049        |



|                                        |       |          |                 |         |        |               |               |               |        |               |
|----------------------------------------|-------|----------|-----------------|---------|--------|---------------|---------------|---------------|--------|---------------|
| <b>KCl:O<sub>2</sub><sup>-a</sup></b>  |       |          |                 |         |        | <b>1,9512</b> | <b>1,9551</b> | <b>2,4360</b> |        | <b>0,4337</b> |
| VWN/IV                                 | VWN   | III      | III             | III     | 1,6149 | 1,6180        | 3,1261        | -28,33        | 1,1238 |               |
| VWN/IV                                 | VWN   | IV       | IV              | IV      | 1,8674 | 1,8799        | 2,6715        | -9,67         | 0,6692 |               |
| VWN/IV                                 | VWN   | V        | V               | V       | 1,8964 | 1,9031        | 2,6035        | -6,88         | 0,6012 |               |
| VWN/IV                                 | BP86  | III      | III             | III     | 1,9976 | 2,0039        | 2,1316        | 12,50         | 0,1293 |               |
| VWN/IV                                 | BP86  | IV       | IV              | IV      | 1,9968 | 2,0036        | 2,1413        | 12,10         | 0,1390 |               |
| VWN/IV                                 | BP86  | V        | V               | V       | 1,9987 | 2,0057        | 2,1131        | 13,26         | 0,1108 |               |
| VWN/IV                                 | B3LYP | 6-311g** | 6-31g**         | 6-31g** | 2,0019 | 2,0091        | 2,1765        | 10,65         | 0,1742 |               |
| <b>KCl:S<sub>2</sub><sup>-f</sup></b>  |       |          |                 |         |        | <b>0,9484</b> | <b>0,9500</b> | <b>3,4303</b> |        | <b>1,428</b>  |
| VWN/IV                                 | VWN   | III      | III             | III     | 0,4090 | 0,4109        | 3,7047        | -8,00         | 1,7024 |               |
| VWN/IV                                 | VWN   | IV       | IV              | IV      | 0,5424 | 0,5439        | 3,6968        | -7,77         | 1,6945 |               |
| VWN/IV                                 | VWN   | V        | V               | V       | 0,5769 | 0,5975        | 3,6164        | -5,43         | 1,6141 |               |
| VWN/IV                                 | VWN   | 6-311g** | 6-31g           | 6-31g** | 0,5104 | 0,5244        | 3,6984        | -7,82         | 1,6961 |               |
| VWN/IV                                 | VWN   | 6-311g** | 6-31g*          | 6-31g** | 0,5801 | 0,5843        | 3,6555        | -6,57         | 1,6532 |               |
| VWN/IV                                 | VWN   | 6-311g** | 6-31g**         | 6-31g** | 0,5985 | 0,6002        | 3,6352        | -5,97         | 1,6329 |               |
| VWN/IV                                 | BP86  | III      | III             | III     | 1,7080 | 1,7232        | 2,9563        | 13,82         | 0,954  |               |
| VWN/IV                                 | BP86  | IV       | IV              | IV      | 1,5936 | 1,6064        | 3,0716        | 10,46         | 1,0693 |               |
| VWN/IV                                 | BP86  | V        | V               | V       | 1,5539 | 1,5955        | 3,1645        | 7,75          | 1,1622 |               |
| VWN/IV                                 | B3LYP | 6-311g** | 6-31g**         | 6-31g** | 2,0024 | 2,0349        | 2,3667        | 31,01         | 0,3644 |               |
| <b>KBr:O<sub>2</sub><sup>-a</sup></b>  |       |          |                 |         |        | <b>1,9268</b> | <b>1,9315</b> | <b>2,5203</b> |        | <b>0,5180</b> |
| VWN/IV                                 | VWN   | IV       | IV              | IV      | 1,4295 | 1,4329        | 3,3708        | -33,75        | 1,3685 |               |
| VWN/IV                                 | Bp86  | IV       | IV              | IV      | 1,9990 | 2,0079        | 2,1188        | 15,93         | 0,1165 |               |
| <b>KBr:S<sub>2</sub><sup>-f</sup></b>  |       |          |                 |         |        | <b>0,9434</b> | <b>0,8388</b> | <b>3,5037</b> |        | <b>1,5014</b> |
| VWN/IV                                 | VWN   | IV       | IV              | IV      | 1,1168 | 1,1119        | 3,4948        | 0,25          | 1,4925 |               |
| VWN/IV                                 | Bp86  | IV       | IV              | IV      | 1,8867 | 1,8648        | 2,6793        | 23,53         | 0,6770 |               |
| <b>KI:O<sub>2</sub><sup>-a</sup></b>   |       |          |                 |         |        | <b>1,9370</b> | <b>1,9420</b> | <b>2,4859</b> |        | <b>0,4836</b> |
| VWN/IV                                 | VWN   | IV       | IV              | IV      | 1,7997 | 1,8057        | 2,8292        | -13,81        | 0,8269 |               |
| VWN/IV                                 | Bp86  | IV       | IV              | IV      | 1,9988 | 2,0079        | 2,1179        | 14,80         | 0,1156 |               |
| <b>KI:S<sub>2</sub><sup>-f</sup></b>   |       |          |                 |         |        | <b>1,6369</b> | <b>1,6254</b> | <b>3,0629</b> |        | <b>1,0606</b> |
| VWN/IV                                 | VWN   | IV       | IV              | IV      | 1,5654 | 1,5537        | 3,1655        | -3,35         | 1,1632 |               |
| VWN/IV                                 | Bp86  | IV       | IV              | IV      | 1,9617 | 1,9359        | 2,5121        | 17,98         | 0,5098 |               |
| <b>KI:SSe<sup>-g</sup></b>             |       |          |                 |         |        | <b>0,9681</b> | <b>0,9532</b> | <b>3,6290</b> |        | <b>1,6267</b> |
| VWN/IV                                 | VWN   | IV       | IV              | IV      | 1,1042 | 1,0924        | 3,5028        | 3,48          | 1,5005 |               |
| VWN/IV                                 | Bp86  | IV       | IV              | IV      | 1,5059 | 1,4764        | 3,2290        | 11,02         | 1,2267 |               |
| <b>KI:Se<sub>2</sub><sup>-g</sup></b>  |       |          |                 |         |        | <b>0,7824</b> | <b>0,7698</b> | <b>3,7079</b> |        | <b>1,7056</b> |
| VWN/IV                                 | VWN   | IV       | IV              | IV      | 0,7831 | 0,7752        | 3,6229        | 2,29          | 1,6206 |               |
| VWN/IV                                 | Bp86  | IV       | IV              | IV      | 1,0101 | 0,9913        | 3,5399        | 4,53          | 1,5376 |               |
| <b>RbCl:O<sub>2</sub><sup>-a</sup></b> |       |          |                 |         |        | <b>1,9836</b> | <b>1,9846</b> | <b>2,2947</b> |        | <b>0,2924</b> |
| VWN/IV                                 | VWN   | III      | III             | III     | 0,3304 | 0,3323        | 3,9419        | -71,78        | 1,9396 |               |
| VWN/IV                                 | VWN   | IV       | IV              | IV      | 0,8615 | 0,8638        | 3,7549        | -63,63        | 1,7526 |               |
| VWN/IV                                 | VWN   | V        | V               | V       | 1,5309 | 1,5344        | 3,2903        | -43,39        | 1,288  |               |
| VWN/IV                                 | BP86  | III      | III             | III     | 1,9986 | 2,0058        | 2,1087        | 8,11          | 0,1064 |               |
| VWN/IV                                 | BP86  | IV       | IV              | IV      | 1,9976 | 2,0059        | 2,1231        | 7,48          | 0,1208 |               |
| VWN/IV                                 | BP86  | V        | V               | V       | 1,9987 | 2,0065        | 2,1005        | 8,46          | 0,0982 |               |
| VWN/IV                                 | BP86  | 6-311g** | 3-21G + GP + HP | 6-31g** | 1,9874 | 2,0046        | 2,1088        | 8,10          | 0,1065 |               |
| VWN/IV                                 | B3LYP | 6-311g** | 3-21G + GP + HP | 6-31g** | 2,0019 | 2,0094        | 2,1682        | 5,51          | 0,1659 |               |

|                                          |       |          |                 |         |        |               |               |               |        |               |
|------------------------------------------|-------|----------|-----------------|---------|--------|---------------|---------------|---------------|--------|---------------|
| <b>RbCl:S<sub>2</sub><sup>-h</sup></b>   |       |          |                 |         |        | <b>1,8728</b> | <b>1,8881</b> | <b>2,6515</b> |        | <b>0,6492</b> |
| VWN/IV                                   | VWN   | III      | III             | III     | 1,0329 | 1,0393        | 3,5541        | -34,04        | 1,5518 |               |
| VWN/IV                                   | VWN   | IV       | IV              | IV      | 1,0576 | 1,0641        | 3,5053        | -32,20        | 1,503  |               |
| VWN/IV                                   | VWN   | V        | V               | V       | 1,4032 | 1,4555        | 3,2459        | -22,42        | 1,2436 |               |
| VWN/IV                                   | BP86  | III      | III             | III     | 1,9033 | 1,9232        | 2,5711        | 3,03          | 0,5688 |               |
| VWN/IV                                   | BP86  | IV       | IV              | IV      | 1,9058 | 1,9253        | 2,5528        | 3,72          | 0,5505 |               |
| VWN/IV                                   | BP86  | V        | V               | V       | 1,9105 | 1,9266        | 2,5073        | 5,44          | 0,505  |               |
| VWN/IV                                   | VWN   | 6-311g** | 3-21G           | 6-31g** | 1,1091 | 1,1308        | 3,4535        | -30,25        | 1,4512 |               |
| VWN/IV                                   | VWN   | 6-311g** | 3-21G + GP      | 6-31g** | 1,341  | 1,3675        | 3,2513        | -22,62        | 1,249  |               |
| VWN/IV                                   | VWN   | 6-311g** | 3-21G + HP      | 6-31g** | 1,2274 | 1,2985        | 3,2958        | -24,30        | 1,2935 |               |
| VWN/IV                                   | VWN   | 6-311g** | 3-21G + GP + HP | 6-31g** | 1,4234 | 1,4824        | 3,2052        | -20,88        | 1,2029 |               |
| VWN/IV                                   | BP86  | 6-311g** | 6-31g**         | 6-31g** | 1,8968 | 1,9267        | 2,5635        | 3,32          | 0,5612 |               |
| VWN/IV                                   | B3LYP | 6-311g** | 3-21G + GP + HP | 6-31g** | 2,0016 | 2,0241        | 2,1386        | 19,34         | 0,1363 |               |
| <b>RbBr:O<sub>2</sub><sup>-a</sup></b>   |       |          |                 |         |        | <b>1,9745</b> | <b>1,9763</b> | <b>2,3425</b> |        | <b>0,3402</b> |
| VWN/IV                                   | VWN   | IV       | IV              | IV      | 0,2953 | 0,2974        | 3,9416        | -68,26        | 1,9393 |               |
| VWN/IV                                   | VWN   | V        | V               | V       | 1,6459 | 1,6488        | 2,8623        | -22,19        | 0,8600 |               |
| VWN/IV                                   | Bp86  | IV       | IV              | IV      | 1,9979 | 2,0067        | 2,1172        | 9,62          | 0,1149 |               |
| <b>RbBr:S<sub>2</sub><sup>-f,h</sup></b> |       |          |                 |         |        | <b>1,7448</b> | <b>1,7571</b> | <b>2,8936</b> |        | <b>0,8913</b> |
| VWN/IV                                   | VWN   | IV       | IV              | IV      | 0,1673 | 0,1692        | 3,8016        | -31,38        | 1,7993 |               |
| VWN/IV                                   | VWN   | V        | V               | V       | 0,3491 | 0,3516        | 3,7924        | -31,06        | 1,7901 |               |
| VWN/IV                                   | Bp86  | IV       | IV              | IV      | 0,6418 | 0,6465        | 3,6644        | -26,64        | 1,6621 |               |
| <b>RbI:O<sub>2</sub><sup>-a</sup></b>    |       |          |                 |         |        | <b>1,9674</b> | <b>1,9695</b> | <b>2,3774</b> |        | <b>0,3751</b> |
| VWN/IV                                   | VWN   | IV       | IV              | IV      | 0,8271 | 0,8299        | 3,8101        | -60,26        | 1,8078 |               |
| VWN/IV                                   | VWN   | V        | V               | V       | 1,4363 | 1,4411        | 3,3709        | -41,79        | 1,3686 |               |
| VWN/IV                                   | Bp86  | IV       | IV              | IV      | 1,9977 | 2,0083        | 2,1334        | 10,26         | 0,1311 |               |
| <b>RbI:S<sub>2</sub><sup>-f</sup></b>    |       |          |                 |         |        | <b>1,2895</b> | <b>1,2968</b> | <b>3,3595</b> |        | <b>1,3572</b> |
| VWN/IV                                   | VWN   | IV       | IV              | IV      | 0,8728 | 0,9016        | 3,6182        | -7,70         | 1,6159 |               |
| VWN/IV                                   | VWN   | V        | V               | V       | 1,5707 | 1,5877        | 3,1911        | 5,01          | 1,1888 |               |
| VWN/IV                                   | Bp86  | IV       | IV              | IV      | 1,4696 | 1,4836        | 3,3056        | 1,60          | 1,3033 |               |

<sup>a</sup>Reference[8]

<sup>b</sup>Reference[15]

<sup>c</sup>Reference[17]

<sup>d</sup>Reference[18]

<sup>e</sup>Reference[19]

<sup>f</sup>Reference[12]

<sup>g</sup>Reference[13]

<sup>h</sup>Reference[20]

S.TABLE III. Theoretical and experimental  $^{17}\text{O}$ ,  $^{33}\text{S}$  and  $^{77}\text{Se}$  hyperfine couplings (in MHz) for the  $\text{O}_2^-$ ,  $\text{S}_2^-$  and  $\text{Se}_2^-$  molecular ions doped in NaCl using various functional forms.

|                 |       | exp.      | VWN    |        | Bp86   |        | B3LYP  | B3Pw91 | B3P86  | PBE1PBE | BHandHLYP |
|-----------------|-------|-----------|--------|--------|--------|--------|--------|--------|--------|---------|-----------|
|                 |       |           | ADF    | G03    | ADF    | G03    | G03    | G03    | G03    | G03     | G03       |
| $\text{O}_2^-$  | $A_x$ | n.a.      | 22,8   | 82,9   | 46,7   | 58,6   | 55,1   | 63,7   | 63,7   | 52,9    | 31,2      |
|                 | $A_y$ | n.a.      | -128,4 | -149,1 | -181,2 | -174,3 | -193,1 | -183,1 | -182,6 | -194,3  | -227,7    |
|                 | $A_z$ | n.a.      | 58,7   | 86,2   | 48,0   | 62,3   | 58,1   | 66,1   | 65,8   | 55,3    | 35,3      |
| $\text{S}_2^-$  | $A_x$ | $< A_y^a$ | -10,0  | -11,3  | -47,9  | -45,6  | -41,1  | -46,9  | -47,4  | -48,1   | -30,3     |
|                 | $A_y$ | 108,5     | 71,4   | 71,9   | 81,7   | 82,3   | 96,6   | 93,8   | 93,6   | 93,0    | 108,9     |
|                 | $A_z$ | $< A_y$   | -30,0  | -36,3  | -48,9  | -46,2  | -42,3  | -47,2  | -48,7  | -49,5   | -32,4     |
| $\text{Se}_2^-$ | $A_x$ | $63^b$    | -40,8  | -23,5  | -244,2 | -260,8 | -252,8 | -256,6 | -256,9 | -260,4  | -229,2    |
|                 | $A_y$ | 350,0     | 271,0  | 292,7  | 337,4  | 364,4  | 374,4  | 402,5  | 404,5  | 399,7   | 478,4     |
|                 | $A_z$ | 287,0     | 234,0  | 240,7  | -266,5 | -264,4 | -258,4 | -262,7 | -262,3 | -266,2  | -237,2    |

<sup>a</sup>Reference[15]

<sup>b</sup>Reference[17]

S.Table IV. Experimental and theoretical  $^{17}\text{O}$ ,  $^{33}\text{S}$  and  $^{77}\text{Se}$  hyperfine couplings (MHz) using ADF and the VWN functional form and basis set IV for the NaZ and KZ lattices. For the RbZ lattices basis set V was used.

|      |       | experimental                |                |           |                 |                 |                 | theoretical    |                |        |       |                 |                 |
|------|-------|-----------------------------|----------------|-----------|-----------------|-----------------|-----------------|----------------|----------------|--------|-------|-----------------|-----------------|
|      |       | $\text{O}_2^-$ <sup>a</sup> | $\text{S}_2^-$ | S         |                 |                 | $\text{Se}_2^-$ | $\text{O}_2^-$ | $\text{S}_2^-$ | S      |       |                 | $\text{Se}_2^-$ |
|      |       |                             |                | S         | Se              | $\text{Se}_2^-$ |                 |                |                | S      | Se    | $\text{Se}_2^-$ |                 |
| NaCl | $A_x$ | n.a.                        | $< A_y^b$      | $< A_z^d$ | 69 <sup>e</sup> | 63 <sup>f</sup> | 25,9            | -10,0          | -7,5           | -95,7  | -40,8 |                 |                 |
|      | $A_y$ | n.a.                        | 108,5          | 80,0      | 432,0           | 350,0           | -128,9          | 71,4           | 50,4           | 293,7  | 271,9 |                 |                 |
|      | $A_z$ | n.a.                        | $< A_y$        | 60,0      | 200,0           | 287,0           | 59,4            | -30,0          | 35,7           | 232,8  | 234,7 |                 |                 |
| NaBr | $A_x$ | n.a.                        | n.a.           | n.a.      | n.a.            | 60 <sup>g</sup> | 24,9            | -13,8          | -10,8          | -107,6 | -46,6 |                 |                 |
|      | $A_y$ | n.a.                        | n.a.           | n.a.      | n.a.            | 357,0           | -125,5          | 71,6           | 54,1           | 300,0  | 267,3 |                 |                 |
|      | $A_z$ | n.a.                        | n.a.           | n.a.      | n.a.            | 275,0           | 57,9            | -31,7          | 26,5           | 173,3  | 220,5 |                 |                 |
| NaI  | $A_x$ | n.a.                        | n.a.           | n.a.      | n.a.            | n.a.            | -123,7          | -15,9          | -13,1          | -13,6  | -44,5 |                 |                 |
|      | $A_y$ | n.a.                        | n.a.           | n.a.      | n.a.            | n.a.            | 28,1            | 72,9           | 57,7           | -315,4 | 257,8 |                 |                 |
|      | $A_z$ | n.a.                        | n.a.           | n.a.      | n.a.            | n.a.            | -57,5           | -32,4          | 18,7           | 127,8  | 239,0 |                 |                 |
| KCl  | $A_x$ | 189,3                       | $< A_z^c$      | n.a.      | n.a.            | n.a.            | -156,4          | -29,9          | 3,3            | 12,9   | 19,7  |                 |                 |
|      | $A_y$ | $< A_z$                     | $< A_z$        | n.a.      | n.a.            | n.a.            | 15,4            | -28,0          | 4,6            | 21,4   | 30,7  |                 |                 |
|      | $A_z$ | 55,1                        | 137,0          | n.a.      | n.a.            | n.a.            | -72,9           | 115,0          | 156,8          | 854,6  | 820,4 |                 |                 |
| KBr  | $A_x$ | 181,3                       | $< A_z^c$      | n.a.      | n.a.            | n.a.            | -143,4          | 1,3            | 5,3            | 14,8   | 20,3  |                 |                 |
|      | $A_y$ | $< A_z$                     | $< A_z$        | n.a.      | n.a.            | n.a.            | 16,2            | 22,3           | 14,5           | 69,4   | 33,7  |                 |                 |
|      | $A_z$ | 71,1                        | 145,0          | n.a.      | n.a.            | n.a.            | -73,2           | 122,6          | 137,8          | 775,9  | 806,4 |                 |                 |
| KI   | $A_x$ | 184,3                       | $< A_y^c$      | $< A_y^g$ | $< A_y^g$       | $< A_y^g$       | -113,2          | -5,6           | 4,7            | 5,6    | 62,7  |                 |                 |
|      | $A_y$ | $< A_z$                     | 64,0           | $< A_z$   | $< A_z$         | $< A_z$         | 26,1            | 37,5           | 20,8           | 102,4  | 24,5  |                 |                 |
|      | $A_z$ | 64,2                        | 93,0           | 141,0     | 749,0           | 740,0           | -45,5           | 90,4           | 123,0          | 698,6  | 732,8 |                 |                 |
| RbCl | $A_x$ | 201,6                       | n.a.           | n.a.      | n.a.            | n.a.            | -177,3          | -21,6          | 4,7            | -2,5   | 17,6  |                 |                 |
|      | $A_y$ | $< A_x$                     | n.a.           | n.a.      | n.a.            | n.a.            | 4,0             | 61,8           | 27,1           | 160,7  | 47,3  |                 |                 |
|      | $A_z$ | $< A_x$                     | n.a.           | n.a.      | n.a.            | n.a.            | -46,2           | 238,8          | 120,9          | 791,4  | 889,0 |                 |                 |
| RbBr | $A_x$ | n.a.                        | n.a.           | n.a.      | n.a.            | n.a.            | -239,3          | 4,6            | 6,0            | 7,6    | 14,5  |                 |                 |
|      | $A_y$ | n.a.                        | n.a.           | n.a.      | n.a.            | n.a.            | 18,3            | 6,5            | 13,3           | 19,6   | 18,6  |                 |                 |
|      | $A_z$ | n.a.                        | n.a.           | n.a.      | n.a.            | n.a.            | -57,2           | 168,1          | 136,5          | 964,3  | 908,5 |                 |                 |
| RbI  | $A_x$ | 193,7                       | $< A_z^c$      | n.a.      | n.a.            | n.a.            | -187,3          | 3,2            | 4,8            | 19,9   | 20,9  |                 |                 |
|      | $A_y$ | $< A_x$                     | $< A_z$        | n.a.      | n.a.            | n.a.            | 7,6             | 15,6           | 5,9            | 50,2   | 31,7  |                 |                 |
|      | $A_z$ | $< A_x$                     | 105,0          | n.a.      | n.a.            | n.a.            | -57,3           | 144,3          | 156,0          | 999,3  | 890,5 |                 |                 |

<sup>a</sup>Reference[8]

<sup>b</sup>Reference[15]

<sup>c</sup>Reference[12]

<sup>d</sup>Reference[21]

<sup>e</sup>Reference[13]

<sup>f</sup>Reference[17]

<sup>g</sup>Reference[19]
